## Original article

**Impact of tobacco smoking on response to tumour necrosis factor-alpha inhibitor treatment in patients with ankylosing spondylitis: results from the Danish nationwide DANBIO registry**

Bente Glintborg<sup>1,2</sup>, Pil Højgaard<sup>1</sup>, Merete Lund Hetland<sup>2,3,4</sup>, Niels Steen Krogh<sup>5</sup>, Gina Kollerup<sup>6</sup>, Jørgen Jensen<sup>7</sup>, Stavros Chrysidis<sup>8</sup>, Inger Marie Jensen Hansen<sup>9</sup>, Mette Holland-Fischer<sup>10</sup>, Torben Højland Hansen<sup>11</sup>, Christine Nilsson<sup>12</sup>, Jakob Espesen<sup>13</sup>, Henrik Nordin<sup>7</sup>, Anne Gitte Rasmussen Loft<sup>14</sup>, Randi Pelck<sup>15</sup>, Tove Lorenzen<sup>16</sup>, Sussi Flejsborg Oeftiger<sup>17</sup>, Barbara Unger<sup>18</sup>, Frank Jaeger<sup>19</sup>, Peter Mosborg Petersen<sup>20</sup>, Claus Rasmussen<sup>21</sup> and Lene Dreyer<sup>1</sup>

**Abstract**

**Objectives.** To investigate the association between tobacco smoking and disease activity, treatment adherence and treatment responses in patients with AS treated with their first tumour necrosis factor-alpha inhibitor (TNFi) therapy in routine care.

**Methods.** Observational cohort study based on the Danish nationwide DANBIO registry. Kaplan–Meier plots, Cox and logistic regression analyses by smoking status (current/never/previous) were calculated for treatment adherence and BASDAI 50%/20 mm-response. Additional stratified analyses were performed for gender and TNFi-type.

**Results.** Of 1576 AS patients included in the study, 1425(90%) had known smoking status (current/never/previous: 43%/41%/16%). The median follow-up time was 2.02 years (IQR 0.69–5.01). At baseline, current smokers compared with never smokers had longer disease duration (4 years (1–12)/2 years (0–10)), higher BASDAI (61 mm (47–73)/58 mm (44–70)), BASFI (53 mm (35–69)/46 mm (31–66)) and BASMI (40 mm (20–60)/30 mm (10–50)) scores (all  $P < 0.01$ ). Current and previous smokers had shorter treatment adherence than never smokers (current: 2.30 years (1.81–2.79) (median (95% CI)); previous: 2.48 years (1.56–3.40), never: 4.12 years (3.29–4.95)),  $P < 0.0001$ ). Similar results were found in multivariate analyses (current versus never smokers, HR 1.41 (95% CI 1.21–1.65),  $P < 0.001$ ), most pronounced among men. Current smokers had poorer 6 months' BASDAI50%/20 mm-response rate than never smokers (42%/58%,  $P < 0.001$ ). In multivariate analyses, current smokers had lower odds of achieving

<sup>1</sup>Department of Rheumatology, Gentofte University Hospital, Copenhagen, Denmark, <sup>2</sup>The Danish Rheumatologic Database, Rigshospitalet, Glostrup Hospital, Glostrup, Denmark, <sup>3</sup>Copenhagen Centre for Arthritis Research, Centre for Rheumatology and Spine Diseases, Rigshospitalet, Glostrup Hospital, Glostrup, Denmark, <sup>4</sup>Department of Clinical Medicine, Faculty of Health and Medical Sciences, University of Copenhagen, Copenhagen, Denmark, <sup>5</sup>Zitelab Aps, Copenhagen, Denmark, <sup>6</sup>Department of Rheumatology, Frederiksberg Hospital, Frederiksberg, Denmark, <sup>7</sup>Department of Rheumatology, Rigshospitalet, Glostrup Hospital, Glostrup, Denmark, <sup>8</sup>Department of Rheumatology, Esbjerg Hospital, Esbjerg, Denmark, <sup>9</sup>Department of Rheumatology, Svendborg Hospital, Svendborg, Denmark, <sup>10</sup>Department of Rheumatology, Aalborg University Hospital, Aalborg, Denmark, <sup>11</sup>Department of Rheumatology, Holbæk Hospital, Holbæk, Denmark, <sup>12</sup>Department of Rheumatology, Odense University Hospital, Odense, Denmark,

<sup>13</sup>Department of Rheumatology, Vejle Hospital, Vejle, Denmark, <sup>14</sup>Department of Rheumatology, Aarhus University Hospital, Aarhus, Denmark, <sup>15</sup>Department of Rheumatology, Køge Hospital, Køge, Denmark, <sup>16</sup>Department of Rheumatology, Silkeborg University Hospital, Silkeborg, Denmark, <sup>17</sup>Department of Rheumatology, Slagelse Hospital, Slagelse, Denmark, <sup>18</sup>Department of Rheumatology, Horsens Hospital, Horsens, Denmark, <sup>19</sup>Department of Rheumatology, Holstebro Hospital, Holstebro, Denmark, <sup>20</sup>Department of Rheumatology, Randers Hospital, Randers, Denmark and <sup>21</sup>Department of Rheumatology, Sygehus Vendsyssel, Hjørring, Denmark

Submitted 14 April 2015; revised version accepted 27 October 2015

Correspondence to: Bente Glintborg, Department of Rheumatology, Gentofte University Hospital, Copenhagen, 2900, Denmark.  
E-mail: glintborg@dadlnet.dk

BASDAI50%/20 mm-response than never smokers, both overall (OR 0.48 (95% CI 0.35–0.65),  $P < 0.0001$ ) and for the different TNFi-types (adalimumab 0.45 (0.27–0.76)/etanercept 0.24 (0.10–0.61)/infliximab 0.57 (0.34–0.95)).

**Conclusion.** In this study of TNFi-treated AS patients in clinical practice, current and previous smokers had significantly poorer patient-reported outcomes at baseline, shorter treatment adherence and poorer treatment response compared with never smokers.

**Key words:** Ankylosing spondylitis, Smoking, Tumour necrosis factor-alpha inhibitors, Outcome, Routine care

### Rheumatology key messages

- Current smoking was frequent among TNF inhibitor treated Danish patients with AS.
- Upon start of TNF inhibitor treatment, smokers with AS had higher disease activity than never smokers.
- In AS, smokers (current or previous) had poorer TNF inhibitor treatment response and adherence than never smokers.

## Introduction

The introduction of TNF- $\alpha$  inhibitor (TNFi) treatment has improved outcomes in AS. Nevertheless, approximately half of the patients terminate treatment owing to side effects or lack of effect [1–4]. Several studies have aimed to identify effect modifiers and predictors of treatment response [5–7], but it has proven difficult to pinpoint the patients who are most likely to benefit from therapy [7].

Smoking is an important and potentially modifiable risk factor in axial spondyloarthritis (axSpA) and AS [8]. Current smokers seem to have poorer patient-reported outcomes, a higher disease activity [9–13] and a higher risk of progressive, structural damage compared with non-smokers [14, 15]. Studies on the impact of smoking on effectiveness of TNFi treatment in AS patients are few. In a recent Swiss study, current smokers with axSpA had poorer response rates compared with non-smokers in a real-life cohort treated with TNFi [16]. However, smoking did not modify health-related quality of life among TNFi-treated Australian AS patients [17]. Previous studies have reported a negative impact of smoking on the effectiveness of TNFi treatment in patients with RA [18–21] and PsA [22, 23].

The nationwide DANBIO registry includes clinical data on patients with rheumatic diseases treated with TNFi in routine care in Denmark [24, 25]. We have previously described demographics and clinical outcomes in patients with AS treated with TNFi [1]. The primary aim of the present study was to compare effectiveness in current smokers, previous smokers and never smokers regarding disease activity, treatment responses and adherence rates in patients with AS initiating their first TNFi therapy in routine care. The secondary aim was to study whether the impact of smoking was influenced by gender and TNFi type.

## Methods

The DANBIO registry was initiated in the year 2000 and covers >90% of Danish adults suffering from rheumatic

disease treated in routine care with biologics [24, 26]. According to Danish legislation, the registration and publication of data from clinical registries do not require patient consent or approval by ethics committees. Physicians are recommended to report data prospectively by an online system at least biannually and when medication is changed ([www.danbio-online.dk](http://www.danbio-online.dk)).

Baseline demographics include smoking habits, age, gender, BMI, disease duration, current treatment with MTX or other conventional synthetic DMARDs (csDMARD). In addition to CRP level (normal range  $\leq 10$  mg/l) and visual analogue scales (VASs) for scores of pain, patient's global, fatigue and physician's global assessments, the patient's functional status and disease activity are monitored by BASDAI, BASFI and BASMI, which are validated disease outcome measures in AS [27, 28]. By 1 January 2014, 1775 patients with a diagnosis of AS had been registered and treated with a biologic drug (bDMARD), according to the treating rheumatologist. We excluded patients treated with certolizumab pegol ( $n = 5$ ) and bDMARDs other than TNFi ( $n = 12$ ), patients participating in clinical trials ( $n = 140$ ), patients not followed in DANBIO since the commencement of their first TNFi ( $n = 19$ ) or with erroneous baseline registrations ( $n = 23$ ), leaving 1576 patients in the study.

### Tobacco smoking

Patients were divided into three groups according to smoking status: current ( $\geq 1$  cigarette/day), previous and never smokers. In previous smokers, the number of years since smoking cessation was recorded. Smokers who had stopped smoking the year they started TNFi were classified as previous smokers ( $n = 25$ ). Queries were sent to the departments regarding patients with incomplete data on smoking status. A rheumatologist then obtained the information from the medical records or by asking the patients.

### Treatment adherence

Treatment adherence was calculated as the number of years each patient maintained treatment. Start date was the date of the first given dose and stop date was the date

of the first missed dose. Temporary treatment interruptions (e.g. due to infections or surgery) of  $\leq 3$  months' duration were allowed. All observations were censored by 1 September 2014. Among patients with no follow-up since June 2014, data were censored according to the last visit registered.

The reasons for drug discontinuation are registered in DANBIO in pre-specified categories: lack of effect, adverse events, disease remission, pregnancy, surgery, cancer, death, infections, loss to follow-up and other reasons. In the following, reasons for discontinuation are divided into three categories: adverse events (including infection, death or cancer), lack of effect and other (including pregnancy, surgery, loss to follow-up, remission and other reasons for discontinuation).

### Treatment response

Disease activity was evaluated at baseline and after 3 and 6 months' therapy. The baseline visit was defined as a visit within the time frame that ranged from 60 days before until six days after initiation of therapy. For the 3 months' visit, the time frame was 10–17 weeks, and for the 6 months' visit the time frame was 18–32 weeks after treatment start. If more than one registration occurred within a given time frame for an individual patient, the registration closest to the given time-point was selected for analysis. If a patient had no registrations within a given time window, data were registered as missing for the given visit.

In accordance with international recommendations, clinical response was defined as achievement of either a 50% or a 20-mm reduction in BASDAI (BASDAI50%/20mm response) [27, 28]. Arbitrarily and in agreement with previous studies, we classified patients as responders if they achieved clinical response (yes/no) at both the 3 and 6 months' visits compared with baseline. In the case of missing data at either the 3 or 6 months' visit, one registration of clinical response was sufficient to classify the patient as a responder. Patients who stopped treatment within the first 3 months of therapy were considered non-responders ( $n = 112$ ). Response rates were calculated as the proportion of patients who achieved a BASDAI50%/20 mm response.

### Statistics

Statistical analyses were performed by SPSS (version 20.0, SPSS Inc., Chicago, Illinois, USA). Demographic and descriptive data are presented by medians/interquartile ranges (IQRs). Groups were compared by non-parametric tests ( $\chi^2$ , Kruskal-Wallis and Mann-Whitney tests). In all tests,  $P$ -values  $< 0.05$  were considered statistically significant. Calculations were based on observed data and no imputation of missing data was performed.

Kaplan-Meier plots and log rank tests were performed for analyses of treatment adherence for current, previous and never smokers. Additional testing was done in order to ensure that proportionality was present during the observation period (data not shown). We performed univariate and multivariate Cox regression analyses to study the impact of smoking on treatment adherence and

calculated hazard ratios (HRs) for treatment discontinuation with time in study as the underlying time scale. Univariate and multivariate logistic regression analyses and odds ratios (ORs) were calculated to identify the impact of smoking (current/previous/never) on the achievement of clinical response. The following baseline factors were considered *a priori* as confounders and included in all multivariate analyses: age (in quartiles), gender, disease duration (in tertiles), calendar year of starting TNFi (in tertiles). Age, disease duration and year of treatment start were included as categorical variables to allow for possible non-linear effects. Baseline MTX use (yes/no) and TNFi type (adalimumab/etanercept/golimumab/infliximab) were considered potential confounders and were added one by one to the multivariate model, but were only included if they altered the OR/HR of smoking by  $> 10\%$ . Baseline VAS scores, CRP, BMI, BASDAI, BASFI and BASMI were considered intermediate variables between tobacco smoking and outcomes and not included in the main multivariate analyses. For sensitivity we performed multivariate logistic regression analyses (current vs never smokers) that besides the *a priori* confounders additionally included all the variables in which the baseline values differed significantly among current vs never smokers. The latter analysis was also performed where the confounding effect of all variables was adjusted for by use of propensity score. Stratified analyses were performed according to gender and TNFi type (adalimumab/etanercept/infliximab, but not for golimumab, owing to limited data).

## Results

### Characteristics at baseline

A total of 1576 bDMARD-naïve patients initiating treatment with adalimumab, etanercept, golimumab or infliximab as the first TNFi were included (Table 1). Among the 1425 patients (90%) with known smoking status, 43% were current, 41% never and 16% previous smokers, and 39% of women and 44% of men were current smokers. Patients with missing smoking status were more often men and were more often treated with golimumab, in contrast to patients with available smoking information (Table 1).

At baseline, current smokers had higher BASDAI, BASMI and BASFI scores compared with never smokers and had higher BASDAI, patient global and pain scores compared with previous smokers (Table 1). Previous smokers were older and had longer disease duration than current and never smokers. The reasons for stopping TNFi treatment were independent of smoking status (Table 1). Male current smokers had significantly higher BASDAI, BASFI, BASMI and physician global scores and a longer disease duration than male never smokers, whereas age, CRP, BMI, patient's pain, fatigue and global scores were similar (data not shown). Female current smokers had significantly higher BASFI and physician global scores than female never smokers, whereas age, BMI, disease

**TABLE 1** Demographics and patient characteristics

|                                                  | Smoking status |            |            | Current versus never P value <sup>a</sup> | Current versus previous P value <sup>b</sup> | Smoking status unknown |
|--------------------------------------------------|----------------|------------|------------|-------------------------------------------|----------------------------------------------|------------------------|
|                                                  | Current        | Never      | Previous   |                                           |                                              |                        |
| Baseline                                         |                |            |            |                                           |                                              |                        |
| Number, n (%)                                    | 614 (39)       | 578 (37)   | 233 (15)   | —                                         | —                                            | 151 (10)               |
| Age, median (IQR), years                         | 41 (32–50)     | 39 (32–50) | 48 (40–57) | 0.3                                       | <0.0001                                      | 41 (32–51)             |
| Disease duration, median (IQR), years            | 4 (1–12)       | 2 (0–10)   | 9 (1–19)   | 0.01                                      | 0.003                                        | 3 (0–15)               |
| Women, n (%)                                     | 161 (26)       | 192 (33)   | 57 (24)    | 0.008                                     | 0.6                                          | 32 (21) <sup>c</sup>   |
| Body mass index, median (IQR), kg/m <sup>2</sup> | 25 (23–29)     | 26 (22–28) | 26 (24–29) | 0.4                                       | 0.1                                          | 25 (22–28)             |
| TNFi drug type, n (%)                            |                |            |            |                                           |                                              |                        |
| Adalimumab                                       | 231 (38)       | 230 (40)   | 110 (47)   | 0.4                                       | 0.03                                         | 54 (36) <sup>c</sup>   |
| Etanercept                                       | 104 (17)       | 107 (19)   | 42 (18)    |                                           |                                              | 21 (14)                |
| Infliximab                                       | 231 (38)       | 193 (33)   | 74 (32)    |                                           |                                              | 49 (32)                |
| Golimumab                                        | 48 (8)         | 48 (8)     | 7 (3)      |                                           |                                              | 27 (17)                |
| TNFi start year, n (%)                           |                |            |            |                                           |                                              |                        |
| 2000–04                                          | 81 (13)        | 68 (12)    | 25 (11)    | 0.4                                       | 0.2                                          | 23 (15) <sup>c</sup>   |
| 2005–09                                          | 335 (55)       | 302 (52)   | 122 (52)   |                                           |                                              | 61 (40)                |
| 2010–13                                          | 198 (32)       | 208 (36)   | 86 (37)    |                                           |                                              | 67 (44)                |
| MTX use, n (%)                                   | 171 (28)       | 149 (26)   | 50 (31)    | 0.4                                       | 0.06                                         | 37 (25)                |
| CRP, median (IQR), mg/l                          | 13 (5–26)      | 10 (4–23)  | 10 (4–21)  | 0.07                                      | 0.8                                          | 13 (6–23)              |
| BASDAI, median (IQR)                             | 61 (47–73)     | 58 (44–70) | 56 (41–69) | 0.009                                     | 0.002                                        | 62 (44–71)             |
| BASFI, median (IQR)                              | 53 (35–69)     | 46 (31–66) | 51 (33–69) | 0.002                                     | 0.3                                          | 50 (36–70)             |
| BASMI, median (IQR)                              | 40 (20–60)     | 30 (10–50) | 40 (20–60) | <0.0001                                   | 0.7                                          | 40 (15–50)             |
| Patient global (0–100), median (IQR), mm         | 69 (52–82)     | 69 (49–83) | 67 (46–79) | 0.3                                       | 0.04                                         | 71 (52–84)             |
| Patient pain (0–100), median (IQR), mm           | 67 (49–78)     | 65 (45–79) | 62 (44–76) | 0.3                                       | 0.02                                         | 65 (45–78)             |
| Patient fatigue (0–100), median (IQR), mm        | 69 (51–82)     | 70 (46–81) | 68 (46–77) | 0.3                                       | 0.07                                         | 71 (56–84)             |
| Physician global (0–100), median (IQR), mm       | 40 (25–58)     | 35 (22–49) | 38 (21–55) | 0.001                                     | 0.07                                         | 33 (21–47)             |
| Stop reason, n (%) <sup>d</sup>                  |                |            |            |                                           |                                              |                        |
| Lack of efficacy                                 | 162 (40)       | 140 (44)   | 67 (46)    | 0.4                                       | 0.5                                          | 39 (46)                |
| Adverse events                                   | 117 (29)       | 77 (24)    | 38 (26)    |                                           |                                              | 21 (25)                |
| Other                                            | 117 (29)       | 88 (28)    | 40 (27)    |                                           |                                              | 24 (29)                |
| Unknown                                          | 10 (2)         | 10 (3)     | 2 (1)      |                                           |                                              | 0 (0)                  |
| Changes at 3 months <sup>e</sup>                 |                |            |            |                                           |                                              |                        |
| Change in Patient global, median (IQR), mm       | 26 (6–48)      | 33 (16–59) | 22 (7–43)  | 0.003                                     | 0.6                                          | —                      |
| Change in Patient pain, median (IQR), mm         | 28 (8–49)      | 37 (13–55) | 22 (7–46)  | 0.03                                      | 0.4                                          | —                      |
| Change in Patient fatigue, median (IQR), mm      | 19 (2–38)      | 24 (6–51)  | 20 (2–33)  | 0.009                                     | 1.0                                          | —                      |
| Change in BASDAI, median (IQR)                   | 23 (7–41)      | 29 (14–45) | 18 (9–35)  | 0.004                                     | 0.4                                          | —                      |
| Change in BASFI, median (IQR)                    | 14 (1–29)      | 18 (6–35)  | 12 (1–26)  | 0.005                                     | 0.6                                          | —                      |
| Change in BASMI, median (IQR)                    | 10 (0–20)      | 10 (0–20)  | 10 (0–20)  | 0.9                                       | 0.9                                          | —                      |

Baseline demographics, disease activity and reasons for terminating TNFi treatment, according to smoking status at the baseline visit (n=1576) and changes in disease activity measures between baseline and 3 months' follow-up. <sup>a</sup>Mann-Whitney or  $\chi^2$ . <sup>b</sup>Mann-Whitney or  $\chi^2$ . <sup>c</sup>Significantly different (P < 0.05) compared with all patients with known smoking status. <sup>d</sup>Percentages of patients who have terminated treatment according to smoking status. <sup>e</sup>Change at three months compared with baseline, shown as decreases. Patients with available data at baseline (percentage/%): smoking (90), age (100), disease duration (89), gender (100), BMI (61), drug type (100), start year (100), MTX use y/n (100), CRP (75), BASDAI (76), BASFI (76), BASMI (65), patient global (69), pain (69), fatigue (58), physicians global (56). IQR: interquartile range; TNFi: TNF- $\alpha$  inhibitor; VAS: Visual Analogue Scale; n: number.

duration, patient's pain, fatigue and global scores, BASDAI and BASMI were similar (data not shown).

### Treatment adherence

The total follow-up time was 5983 patient years, with a median follow-up time of 2.02 years (IQR 0.69–5.01). Current and previous smokers had poorer treatment adherence than never smokers (Fig. 1 and Table 2). The tendency was the same in stratified analyses according to

gender, but the results reached statistical significance mainly in men (Table 2).

Among previous smokers, patients who had stopped smoking during the previous 5 years (n = 106) had similar drug survival to the patients who had stopped  $\geq 6$  years previously (n = 111) (Kaplan-Meier, log rank P = 0.8). Patients with missing smoking data had similar treatment adherence to patients with known smoking status (log rank, P = 0.6).



**Fig. 1** Treatment adherence according to smoking status—results from Kaplan–Meier analysis [median (95% CI)]

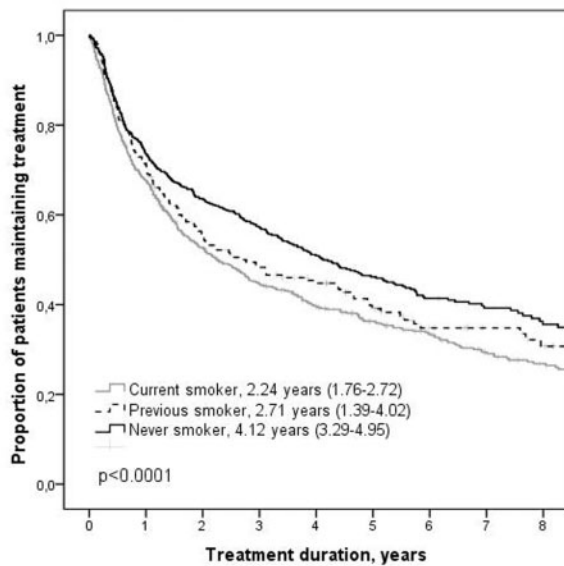

| Treatment duration, years | 0    | 1   | 2   | 3   | 4   | 5   | 6   | 7   | 8   |
|---------------------------|------|-----|-----|-----|-----|-----|-----|-----|-----|
| Patients still treated, n | 1425 | 983 | 739 | 593 | 482 | 367 | 274 | 196 | 140 |
| Stopped treatment, n      | 0    | 26  | 68  | 57  | 52  | 73  | 61  | 60  | 40  |

Hazard ratios for withdrawal from univariate Cox regression analysis: current versus never smokers 1.32 (95% CI 1.14–1.53), previous versus never smokers 1.24 (1.02–1.50). n: number.

Treatment adherence was poorer among current vs never smokers in patients, regardless of type of TNF-inhibitor (Cox regression analyses, Table 3). Previous smokers had poorer treatment adherence than never smokers for adalimumab and etanercept (Table 3).

#### Disease activity and treatment response

Measures of disease activity had improved less in current smokers than in never smokers at 3 months' follow-up (Table 1). Similar tendencies were observed at 6 months for patient global, BASDAI and BASFI scores (data not shown). Both current and previous smokers had lower response rates than never smokers (Fig. 2).

Current and previous smokers had significantly lower odds of achieving response than never smokers, both overall and stratified according to gender (Table 4). For stratified analyses according to TNFi drug type, similar results were found among current versus never smokers for all three TNFi and a tendency of lower odds of response in previous smokers (Table 4).

A sensitivity analysis using multivariate regression including all the variables that differed among current vs never smokers at baseline (BASDAI, BASFI, BASMI, disease duration, VAS physician global) showed similar results (current vs never smokers, OR=0.49 (95% CI 0.32–0.75,  $P < 0.001$ )). When the same covariates were adjusted for in the regression analysis as a propensity score, the results were unaltered (data not shown).

There was no statistically significant interaction between smoking and gender or between smoking and TNFi drug type (both  $P > 0.05$  in Cox and logistic regression analyses).

#### Discussion

In this study of patients with AS who initiated treatment with the first TNFi in a real-life setting, more than half were current or previous smokers. At the start of treatment, current smokers had higher disease activity compared with never and previous smokers. Both current and previous smoking had a negative impact on treatment effectiveness and increased the risk of withdrawing from treatment. These findings are important, since smoking is potentially modifiable.

We found that current smokers had significantly higher BASMI, BASDAI and BASFI scores and a trend towards a higher CRP level at the start of TNFi treatment compared with never smokers. The negative impact of smoking on disease activity has previously been described in cross-sectional studies among patients with AS [9, 11–13, 29, 30]. In an English survey of 612 patients with established AS, smoking was associated with aggravation in patient-reported outcomes, including function, pain and quality of life [9]. Similar results have been reported in patients with early axSpA [10]. However, these studies included none or only low numbers of TNFi-treated patients [9–11, 29, 30]. The negative impact of smoking may be caused by increased systemic inflammation [29, 31], accelerated radiographic progression [8, 14, 32, 33], decreased functional activity, reduced lung capacity, as well as comorbidities or socioeconomic challenges [9, 10, 29, 34]. Finally, smoking might exacerbate the development of abnormal neuromuscular processing and chronic pain due to vasoconstriction and psychological sensitivity [9, 35].

The fact that only approximately half of AS patients benefit from treatment with their first TNFi [1, 4, 36, 37] has fuelled the search for baseline predictors of treatment response in individual patients [6]. However, many previous observational and randomized studies have not included data on smoking status [5, 6, 38, 39]. We found that current smokers had significantly poorer TNFi treatment adherence and treatment effect than never smokers. This is in accordance with a recent Swiss cohort study of 698 patients with axSpA, of whom ~20% had non-radiographic axSpA, and in which current smokers had an OR of 0.54 (0.31 to 0.95) for achieving BASDAI50% reduction after one year's treatment compared with never smokers [16]. Other studies have found no such association. Among 422 Australian TNFi-treated AS patients, smoking had no effect on health-related quality of life [17]. The authors suggested that their inclusion of educational level in the multivariate analyses partly explained this because they found significant differences when educational level was omitted from the regression model [17]. In the current study, we had no data on educational level, and this may have influenced our results. An English cohort study based on data from the British Society for Rheumatology Biologics Register (BSRBR) did not find

**TABLE 2** Impact of smoking on treatment adherence stratified by gender

|                       |                         | Overall           |                   | Men               |                   | Women             |         |
|-----------------------|-------------------------|-------------------|-------------------|-------------------|-------------------|-------------------|---------|
|                       |                         | HR (95% CI)       | P                 | HR (95% CI)       | P                 | HR (95% CI)       | P       |
| Univariate analyses   | Smoking status          |                   |                   |                   |                   |                   |         |
|                       | Current                 | 1.32 (1.14, 1.53) | <0.0001           | 1.41 (1.17, 1.69) | <0.0001           | 1.32 (1.04, 1.70) | 0.03    |
|                       | Previous                | 1.24 (1.02, 1.50) | 0.03              | 1.35 (1.06, 1.71) | 0.01              | 1.18 (0.83, 1.68) | 0.4     |
|                       | Never                   | 1                 |                   | 1                 |                   | 1                 |         |
| Multivariate analyses | Smoking status          |                   |                   |                   |                   |                   |         |
|                       | Current                 | 1.41 (1.21, 1.65) | <0.0001           | 1.49 (1.23, 1.82) | <0.0001           | 1.21 (0.93, 1.59) | 0.15    |
|                       | Previous                | 1.38 (1.12, 1.65) | 0.003             | 1.39 (1.07, 1.80) | 0.01              | 1.34 (0.93, 1.93) | 0.12    |
|                       | Never                   | 1                 |                   | 1                 |                   | 1                 |         |
|                       | Gender                  |                   |                   |                   |                   |                   |         |
|                       | Women                   | 1.64 (1.41, 1.91) | <0.0001           | —                 | —                 | —                 | —       |
|                       | Men                     | 1                 |                   |                   |                   |                   |         |
|                       | Disease duration, years |                   |                   |                   |                   |                   |         |
|                       | 0–1                     | 1.45 (1.22, 1.73) | <0.0001           | 1.28 (1.04, 1.59) | 0.02              | 1.97 (1.41, 2.74) | <0.0001 |
|                       | 2–7                     | 1.34 (1.11, 1.63) | 0.003             | 1.21 (0.96, 1.52) | 0.11              | 1.77 (1.22, 2.57) | 0.004   |
|                       | ≥8                      | 1                 |                   | 1                 |                   | 1                 |         |
|                       | Age, years              |                   |                   |                   |                   |                   |         |
|                       | ≤31                     | 1.02 (0.82, 1.25) | 0.9               | 0.91 (0.71, 1.19) | 0.5               | 1.23 (0.86, 1.78) | 0.3     |
|                       | 32–39                   | 0.86 (0.70, 1.06) | 0.17              | 0.77 (0.59, 1.00) | 0.05              | 1.03 (0.72, 1.46) | 0.9     |
|                       | 40–49                   | 1.08 (0.89, 1.31) | 0.4               | 1.05 (0.84, 1.32) | 0.7               | 1.09 (0.77, 1.55) | 0.6     |
| ≥50                   | 1                       |                   | 1                 |                   | 1                 |                   |         |
| TNFi start year       |                         |                   |                   |                   |                   |                   |         |
| 2000–06               | 0.70 (0.58, 0.86)       | <0.0001           | 0.69 (0.54, 0.88) | 0.003             | 0.79 (0.57, 1.11) | 0.18              |         |
| 2007–09               | 0.89 (0.74, 1.06)       | 0.2               | 0.93 (0.74, 1.17) | 0.5               | 0.86 (0.64, 1.15) | 0.3               |         |
| 2010–13               | 1                       |                   | 1                 |                   | 1                 |                   |         |

Univariate and multivariate Cox regression analyses (including *a priori* confounders). MTX use and TNFi drug type did not alter the HR of smoking by >10% and was not included in the multivariate analyses. HR: hazard ratio for withdrawal; TNFi: TNF- $\alpha$  inhibitor.

that smoking status among the baseline factors predicted BASDAI response in AS patients. However, with only 261 patients (94 current smokers) that study may have been insufficiently powered to answer this question [36]. Furthermore, the multivariate analyses included possible intermediate variables (CRP, BASDAI and BASFI) between smoking and outcome. This might have caused overadjustment bias. Any negative effect of smoking on TNFi treatment effects may be due to elevated inflammatory biologic parameters or increased matrix metalloproteinase levels, which are also predictive factors [40]. According to our study and the Swiss results [16], smoking status seems to be an important risk factor, and future studies should consider including such data.

In the current study, previous smokers had similar treatment duration and treatment effects to those of current smokers. Previous smokers who had stopped smoking  $\geq 6$  years prior to TNFi start had similar treatment duration to the patients who had stopped smoking in recent years. This indicates a permanent negative impact of smoking. Contrasting results were found by Ciurea *et al.* [16] among PsA and RA patients, where previous smokers resemble never smokers—especially if smoking cessation happened many years ago [21, 22, 41]. The negative effects of previous smoking on outcome measures in the current study might partly be explained

by the fact that previous smokers were older and had a longer disease duration than never smokers—although adjustment for these differences did not alter the association. Any potential differences in the effect of modification of smoking across rheumatic diseases remain unexplained. However, these diseases have different age and gender profiles, inflammatory and immune responses, and a uniform smoking effect is not necessarily to be expected [17]. Furthermore, previous studies in the general population have shown that smoking increases the prevalence of lower back pain and degenerative diseases of the back [42–44], which may contribute to the negative impact of ever smoking in AS.

The strengths of this study are the high external validity for routine care, owing to the inclusion of an unselected, nationwide, large population of patients with AS with long follow-up time and known smoking status in 90% of cases. Base-line characteristics and drug adherence were largely the same in patients with missing and known smoking status, which contradicts substantial selection bias. Our study also has limitations. Smoking status was retrieved cross-sectionally at commencement of the first TNFi, although smoking status might later change [21]. An obvious misclassification occurs when previous smokers resume smoking during follow-up. We had no data on duration of smoking or pack-years to

**TABLE 3** Impact of smoking on treatment adherence stratified by TNFi drug type

| Treatment adherence, Kaplan-Meier analyses |                         |                   |        |                    |         |                   |       |
|--------------------------------------------|-------------------------|-------------------|--------|--------------------|---------|-------------------|-------|
|                                            |                         | Adalimumab        |        | Etanercept         |         | Infliximab        |       |
|                                            |                         | Median (95% CI)   | P      | Median (95% CI)    | P       | Median (95% CI)   | P     |
| Treatment adherence <sup>a</sup> , years   | Smoking status          |                   |        |                    |         |                   |       |
|                                            | Current                 | 2.80 (2.01, 3.59) | 0.02   | 2.29 (0.39, 4.20)  | 0.009   | 1.93 (1.19, 2.67) | 0.07  |
|                                            | Never                   | 5.73 (4.08, 7.38) |        | 7.56 (4.03, 11.08) |         | 3.50 (2.46, 4.53) |       |
| Multivariate Cox regression analyses       |                         |                   |        |                    |         |                   |       |
|                                            |                         | HR (95% CI)       | P      | HR (95% CI)        | P       | HR (95% CI)       | P     |
| Multivariate analyses                      | Smoking status          |                   |        |                    |         |                   |       |
|                                            | Current                 | 1.33 (1.02, 1.74) | 0.04   | 2.09 (1.38, 3.18)  | <0.001  | 1.33 (1.05, 1.69) | 0.02  |
|                                            | Previous                | 1.41 (1.02, 1.94) | 0.04   | 2.16 (1.24, 3.77)  | 0.006   | 1.21 (0.85, 1.73) | 0.3   |
|                                            | Never                   | 1                 |        | 1                  |         | 1                 |       |
|                                            | Gender                  |                   |        |                    |         |                   |       |
|                                            | Women                   | 1.79 (1.41, 2.27) | <0.000 | 1.92 (1.28, 2.89)  | 0.002   | 1.42 (1.12, 1.81) | 0.004 |
|                                            | Men                     | 1                 | 1      | 1                  | 1       | 1                 | 1     |
|                                            | Disease duration, years |                   |        |                    |         |                   |       |
|                                            | 0-1                     | 1.51 (1.12, 2.02) | 0.006  | 1.32 (0.85, 2.04)  | 0.2     | 1.42 (1.08, 1.88) | 0.01  |
|                                            | 2-7                     | 1.43 (1.04, 1.96) | 0.03   | 1.02 (0.60, 1.73)  | 0.9     | 1.43 (1.07, 1.91) | 0.02  |
|                                            | ≥8                      | 1                 |        | 1                  |         | 1                 |       |
|                                            | Age, years              |                   |        |                    |         |                   |       |
|                                            | ≤31                     | 1.03 (0.73, 1.45) | 0.9    | 1.05 (0.60, 1.85)  | 0.9     | 1.07 (0.76, 1.50) | 0.7   |
|                                            | 32-39                   | 0.79 (0.56, 1.11) | 0.2    | 1.15 (0.69, 1.94)  | 0.6     | 0.90 (0.65, 1.25) | 0.5   |
|                                            | 40-49                   | 1.07 (0.78, 1.47) | 0.7    | 0.92 (0.57, 1.48)  | 0.9     | 1.14 (0.85, 1.54) | 0.4   |
|                                            | ≥50                     | 1                 |        | 1                  |         | 1                 |       |
|                                            | TNFi start year         |                   |        |                    |         |                   |       |
|                                            | 2000-06                 | 0.62 (0.42, 0.90) | 0.01   | 0.38 (0.23, 0.64)  | <0.0001 | 0.67 (0.47, 0.95) | 0.02  |
|                                            | 2007-09                 | 0.87 (0.67, 1.13) | 0.3    | 0.66 (0.41, 1.06)  | 0.09    | 0.86 (0.61, 1.23) | 0.4   |
|                                            | 2010-13                 | 1                 |        | 1                  |         | 1                 |       |

Log rank tests<sup>a</sup> and multivariate Cox regression analyses (including *a priori* confounders). MTX use did not alter the HR of smoking by >10% and was not included in the multivariate analyses. HR: hazard ratio for withdrawal; TNFi: TNF- $\alpha$  inhibitor

**Fig. 2** BASDAI50%/20 mm-response rates after 6 months' treatment according to smoking status for all patients and stratified according to gender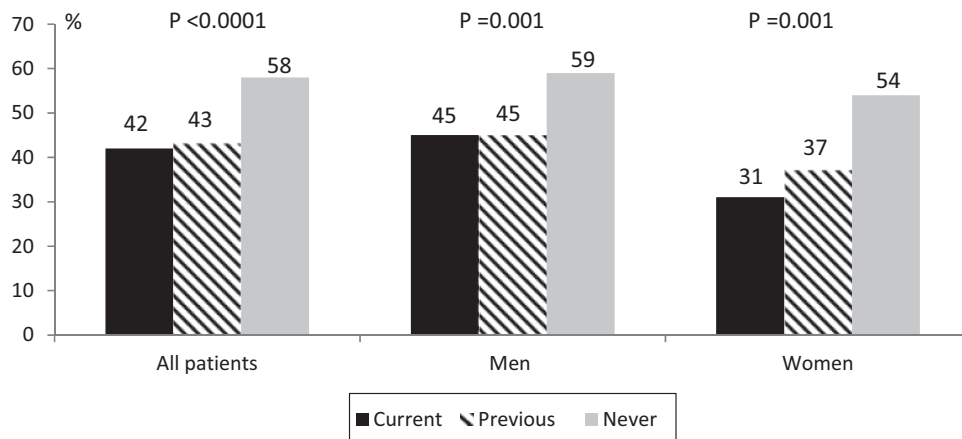

P-values are response rates among current versus never smokers (Chi square).

**TABLE 4** Impact of smoking on treatment response for all patients, stratified by gender and TNFi drug type

|                | Overall           |         | Men               |       | Women             |        |
|----------------|-------------------|---------|-------------------|-------|-------------------|--------|
|                | OR (95% CI)       | P       | OR (95% CI)       | P     | OR (95% CI)       | P      |
| Smoking status |                   |         |                   |       |                   |        |
| Current        | 0.48 (0.35, 0.65) | <0.0001 | 0.55 (0.38, 0.80) | 0.001 | 0.34 (0.19, 0.62) | <0.001 |
| Previous       | 0.53 (0.35, 0.80) | 0.002   | 0.60 (0.37, 0.97) | 0.04  | 0.40 (0.18, 0.88) | 0.02   |
| Never          | 1                 |         | 1                 |       | 1                 |        |
|                | Adalimumab        |         | Etanercept        |       | Infliximab        |        |
|                | OR (95% CI)       | P       | OR (95% CI)       | P     | OR (95% CI)       | P      |
| Smoking status |                   |         |                   |       |                   |        |
| Current        | 0.45 (0.27, 0.76) | 0.002   | 0.24 (0.10, 0.61) | 0.003 | 0.57 (0.34, 0.95) | 0.03   |
| Previous       | 0.58 (0.31, 1.10) | 0.1     | 0.29 (0.10, 0.91) | 0.03  | 0.58 (0.29, 1.14) | 0.11   |
| Never          | 1                 |         | 1                 |       | 1                 |        |

Multivariate logistic regression analyses including *a priori* confounders (odds ratios for confounders not shown in table). MTX use did not alter the HR of smoking by >10% and was not included in the analyses. OR: odds ratio; TNFi: TNF- $\alpha$  inhibitor.

illustrate any dose-response relationship [9, 15]. In Denmark, heavy smokers are more often men [45, 46]. One might assume that the stronger impact of smoking among male patients was associated with greater exposure to tobacco. Smoking may be linked to comorbid disease, depression, socioeconomic factors and lifestyle, which all potentially affect baseline disease activity and treatment outcomes. We had no data with which to explore these issues further. In DANBIO, the clinical diagnosis for individual patients was registered according to the expert opinion of the treating physician. Currently, data regarding HLAB27 status, radiographic data and peripheral joint disease are not uniformly available in DANBIO. In conclusion, this study of AS patients treated with TNFi in clinical practice showed that current and previous smokers had significantly poorer patient-reported outcomes at baseline, shorter treatment adherence and poorer treatment response compared with never smokers.

## Acknowledgements

We should like to thank all the Departments of Rheumatology in Denmark for reporting to the DANBIO registry.

**Funding:** No specific funding was received from any funding bodies in the public, commercial or not-for-profit sectors to carry out the work described in this article.

**Disclosure statement:** C.R. has received a grant for research from Abbvie and Pfizer. M.H.-F. has received consulting fees from Abbvie, speaking fees from UCB and MSD and is an investigator for Roche. T.L. is a consultant for Roche and Pfizer. G.K. has received speaking fees from MSD. A.G.R.L. is a consultant for AbbVie, MSD and Novartis, a member of speakers' bureau for AbbVie, MSD, Pfizer and UCB and a shareholder/stock ownership of Novo Nordisk A/S. L.D. has received speaking fees

from MSD. All other authors have declared no conflicts of interest.

## References

- Glintborg B, Ostergaard M, Krogh NS *et al.* Predictors of treatment response and drug continuation in 842 patients with ankylosing spondylitis treated with anti-tumour necrosis factor: results from 8 years' surveillance in the Danish nationwide DANBIO registry. *Ann Rheum Dis* 2010;69:2002-8.
- Ren L, Li J, Luo R *et al.* Efficacy of antitumor necrosis factor(alpha) agents on patients with ankylosing spondylitis. *Am J Med Sci* 2013;346:455-61.
- Escalas C, Trijau S, Dougados M. Evaluation of the treatment effect of NSAIDs/TNF blockers according to different domains in ankylosing spondylitis: results of a meta-analysis. *Rheumatology* 2010;49:1317-25.
- Machado MA, Barbosa MM, Almeida AM *et al.* Treatment of ankylosing spondylitis with TNF blockers: a meta-analysis. *Rheumatol Int* 2013;33:2199-213.
- Vastesaeger N, van der Heijde D, Inman RD *et al.* Predicting the outcome of ankylosing spondylitis therapy. *Ann Rheum Dis* 2011;70:973-81.
- Arends S, van der Veer E, Kallenberg CG, Brouwer E, Spoorenberg A. Baseline predictors of response to TNF-alpha blocking therapy in ankylosing spondylitis. *Curr Opin Rheumatol* 2012;24:290-8.
- Arends S, Brouwer E, van der Veer E *et al.* Baseline predictors of response and discontinuation of tumor necrosis factor-alpha blocking therapy in ankylosing spondylitis: a prospective longitudinal observational cohort study. *Arthritis Res Ther* 2011;13:R94.
- Braun J, Sieper J, Zink A. The risks of smoking in patients with spondyloarthritis. *Ann Rheum Dis* 2012;71:791-2.
- Mattey DL, Dawson SR, Healey EL, Packham JC. Relationship between smoking and patient-reported



- measures of disease outcome in ankylosing spondylitis. *J Rheumatol* 2011;38:2608–15.
- 10 Chung HY, Machado P, van der Heijde D, D'Agostino MA, Dougados M. Smokers in early axial spondyloarthritis have earlier disease onset, more disease activity, inflammation and damage, and poorer function and health-related quality of life: results from the DESIR cohort. *Ann Rheum Dis* 2012;71:809–16.
  - 11 Reed MD, Dharmage S, Boers A *et al*. Ankylosing spondylitis: an Australian experience. *Intern Med J* 2008;38:321–7.
  - 12 Chen CH, Chen HA, Lu CL *et al*. Association of cigarette smoking with Chinese ankylosing spondylitis patients in Taiwan: a poor disease outcome in systemic inflammation, functional ability, and physical mobility. *Clin Rheumatol* 2013;32:659–63.
  - 13 Aaverns HL, Oxtoby J, Taylor HG *et al*. Smoking and outcome in ankylosing spondylitis. *Scand J Rheumatol* 1996;25:138–42.
  - 14 Poddubnyy D, Haibel H, Listing J *et al*. Baseline radiographic damage, elevated acute-phase reactant levels, and cigarette smoking status predict spinal radiographic progression in early axial spondylarthritis. *Arthritis Rheum* 2012;64:1388–98.
  - 15 Poddubnyy D, Haibel H, Listing J *et al*. Cigarette smoking has a dose-dependent impact on progression of structural damage in the spine in patients with axial spondyloarthritis: results from the GERman SPondyloarthritis Inception Cohort (GESPIC). *Ann Rheum Dis* 2013;72:1430–2.
  - 16 Ciurea A, Scherer A, Weber U *et al*. Impaired response to treatment with tumour necrosis factor alpha inhibitors in smokers with axial spondyloarthritis. *Ann Rheum Dis* 2015; Advance Access published 9 February 2015, doi: 10.1136/annrheumdis-2013-205133.
  - 17 Kydd AS, Chen JS, Makovey J *et al*. Smoking did not modify the effects of anti-TNF treatment on health-related quality of life among Australian ankylosing spondylitis patients. *Rheumatology* 2015;54:310–7.
  - 18 Hyrich KL, Watson KD, Silman AJ, Symmons DP. Predictors of response to anti-TNF-alpha therapy among patients with rheumatoid arthritis: results from the British Society for Rheumatology Biologics Register. *Rheumatology* 2006;45:1558–65.
  - 19 Abhishek A, Butt S, Gadsby K, Zhang W, Deighton CM. Anti-TNF-alpha agents are less effective for the treatment of rheumatoid arthritis in current smokers. *J Clin Rheumatol* 2010;16:15–8.
  - 20 Soderlin MK, Petersson IF, Geborek P. The effect of smoking on response and drug survival in rheumatoid arthritis patients treated with their first anti-TNF drug. *Scand J Rheumatol* 2012;41:1–9.
  - 21 Saevarsdottir S, Wedren S, Seddighzadeh M *et al*. Patients with early rheumatoid arthritis who smoke are less likely to respond to treatment with methotrexate and tumor necrosis factor inhibitors: observations from the Epidemiological Investigation of Rheumatoid Arthritis and the Swedish Rheumatology Register cohorts. *Arthritis Rheum* 2011;63:26–36.
  - 22 Højgaard P, Glintborg B, Hetland ML *et al*. Association between tobacco smoking and response to tumour necrosis factor alpha inhibitor treatment in psoriatic arthritis: results from the DANBIO registry. *Ann Rheum Dis* 2015;74:2130–6.
  - 23 Fagerli KM, Lie E, van der Heijde D *et al*. The role of methotrexate co-medication in TNF-inhibitor treatment in patients with psoriatic arthritis: results from 440 patients included in the NOR-DMARD study. *Ann Rheum Dis* 2014;73:132–7.
  - 24 Danish Rheumatological Database. <https://danbio-online.dk> (November 2015, last accessed).
  - 25 Hetland ML. DANBIO—powerful research database and electronic patient record. *Rheumatology* 2011;50:69–77.
  - 26 Hetland ML, Unkerskov J, Ravn T *et al*. Routine database registration of biological therapy increases the reporting of adverse events twentyfold in clinical practice. First results from the Danish Database (DANBIO). *Scand J Rheumatol* 2005;34:40–4.
  - 27 Anderson JJ, Baron G, van der Heijde D, Felson DT, Dougados M. Ankylosing spondylitis assessment group preliminary definition of short-term improvement in ankylosing spondylitis. *Arthritis Rheum* 2001;44:1876–86.
  - 28 Braun J, Davis J, Dougados M *et al*. First update of the international ASAS consensus statement for the use of anti-TNF agents in patients with ankylosing spondylitis. *Ann Rheum Dis* 2006;65:316–20.
  - 29 Kaan U, Ferda O. Evaluation of clinical activity and functional impairment in smokers with ankylosing spondylitis. *Rheumatol Int* 2005;25:357–60.
  - 30 Bodur H, Ataman S, Rezvani A *et al*. Quality of life and related variables in patients with ankylosing spondylitis. *Qual Life Res* 2011;20:543–9.
  - 31 Colombo G, Clerici M, Giustarini D *et al*. Pathophysiology of tobacco smoke exposure: recent insights from comparative and redox proteomics. *Mass Spectrom Rev* 2014;33:183–218.
  - 32 Ward MM, Weisman MH, Davis JC Jr, Reveille JD. Risk factors for functional limitations in patients with longstanding ankylosing spondylitis. *Arthritis Rheum* 2005;53:710–7.
  - 33 Ward MM, Hendrey MR, Malley JD *et al*. Clinical and immunogenetic prognostic factors for radiographic severity in ankylosing spondylitis. *Arthritis Rheum* 2009;61:859–66.
  - 34 Cavelaars AE, Kunst AE, Geurts JJ *et al*. Educational differences in smoking: international comparison. *BMJ* 2000;320:1102–7.
  - 35 Mitchell MD, Mannino DM, Steinke DT *et al*. Association of smoking and chronic pain syndromes in Kentucky women. *J Pain* 2011;12:892–9.
  - 36 Lord PA, Farragher TM, Lunt M *et al*. Predictors of response to anti-TNF therapy in ankylosing spondylitis: results from the British Society for Rheumatology Biologics Register. *Rheumatology* 2010;49:563–70.
  - 37 Braun J, Baraliakos X, Heldmann F, Kiltz U. Tumor necrosis factor alpha antagonists in the treatment of axial spondyloarthritis. *Expert Opin Investig Drugs* 2014;23:647–59.
  - 38 Rudwaleit M, Claudepierre P, Wordsworth P *et al*. Effectiveness, safety, and predictors of good clinical response in 1250 patients treated with adalimumab for active ankylosing spondylitis. *J Rheumatol* 2009;36:801–8.

- 39 Davis JC Jr, van der Heijde DM, Dougados M *et al.* Baseline factors that influence ASAS 20 response in patients with ankylosing spondylitis treated with etanercept. *J Rheumatol* 2005;32:1751–4.
- 40 Wendling D, Prati C. Spondyloarthritis and smoking: towards a new insight into the disease. *Expert Rev Clin Immunol* 2013;9:511–6.
- 41 Manfredsdottir VF, Vikingsdottir T, Jonsson T *et al.* The effects of tobacco smoking and rheumatoid factor seropositivity on disease activity and joint damage in early rheumatoid arthritis. *Rheumatology* 2006;45:734–40.
- 42 Shiri R, Karppinen J, Leino-Arjas P, Solovieva S, Viikari-Juntura E. The association between smoking and low back pain: a meta-analysis. *Am J Med* 2010;123:87–35.
- 43 Kepler CK, Ponnappan RK, Tannoury CA, Risbud MV, Anderson DG. The molecular basis of intervertebral disc degeneration. *Spine J* 2013;13:318–30.
- 44 Kauppila LI. Atherosclerosis and disc degeneration/low-back pain—a systematic review. *Eur J Vasc Endovasc Surg* 2009;37:661–70.
- 45 Danskernes rygevaner 2012. Tabelrapport for hele befolkningen. Danish Health and Medicines Authority. [https://sundhedsstyrelsen.dk/da/sundhed/tobak/tal-og-undersogelser/danskernes-rygevaner/~/\\_/media/29DD77B5D497489F99D75F1AC757862E.ashx](https://sundhedsstyrelsen.dk/da/sundhed/tobak/tal-og-undersogelser/danskernes-rygevaner/~/_/media/29DD77B5D497489F99D75F1AC757862E.ashx) (November 2015, last accessed).
- 46 Berner O, Etwil P, Graversen T *et al.* 50 års oversigten. Danmarks statistik. <https://www.dst.dk/Site/Dst/Udgivelser/GetPubFile.aspx?id=3189&sid=halvtres> (November 2015, last accessed).
